# Supplementary material for: Oncogenic K-Ras upregulates ITGA6 expression via FOSL1 to induce anoikis resistance and synergizes with αV-Class integrins to promote EMT
Source: PubMed Central journal article supplement (PMC5658677; doi:10.1038/onc.2017.177), 2017-06-12
Supplement: onc2017177x2.pdf [file onc2017177x2.pdf]

Supplementary Table 1 RNA-seq analysis (WT-, K-Ras<sup>12V</sup>- and K-Ras12V/ $\alpha$ V-RFP-MDCK )

P-values  $\leq$  0.05, fold change  $\geq$  2

a. WT and K-Ras<sup>12V</sup> -MDCK

| up                  | down               |
|---------------------|--------------------|
| TRIM36              | SUOX               |
| MAP3K5              | ATP8B1             |
| ENSCAFG00000000402  | PDE7B              |
| DPCR1               | LRIG3              |
| RGS17               | SASH1              |
| IL5                 | AKAP12             |
| TRIB1               | SYNE1              |
| ST3GAL1             | DLA88              |
| OBSCN               | DLA88              |
| GRAP2               | DLA-64             |
| STEAP2              | ZDHHC14            |
| VEGFA               | SLC44A4            |
| FHL2                | SOD2               |
| PKD4                | ENSCAFG00000000686 |
| ETV1                | TMEM74             |
| OXER1               | CELSR1             |
| KLF4                | DLA-DRA1           |
| THAP5               | DLA-DRB1           |
| GJB3                | DLA-DQA            |
| AIM1                | DLA-DQBC1          |
| KLF15               | CSF2               |
| ENSCAFG000000003880 | TAP2               |
| KIAA1462            | PSMB8              |
| GP9                 | TAP1               |
| ENSCAFG000000004348 | DLA-DMA            |
| PPM1N               | IRF1               |
| SERP2               | DSE                |
| PLK3                | A4GALT             |
| PLAUR               | TAPBP              |
| CEACAM28            | ANXA13             |
| 42622               | BAK1               |
| SPRY2               | SQLE               |
| P4HA3               | TGFBI              |
| CBX4                | PACSIN1            |
| FCHSD2              | LY6E               |
| HBEGF               | SCUBE3             |

b. K-Ras12V- and K-Ras12V/ $\alpha$ V-RFP-MDCK

| up                  | down                |
|---------------------|---------------------|
| ZNF516              | SERPINB8            |
| GDF11               | ERBB3               |
| TSPAN8              | IL23A               |
| CELSR1              | ATP8B1              |
| FBLN1               | TRIM36              |
| TRPS1               | C-MYB               |
| SLC30A8             | MAP7                |
| CXCL14              | TNFAIP3             |
| TMEM200A            | LRIG3               |
| KLHL3               | MGAT4B              |
| DAPK1               | AKAP12              |
| NPTXR               | CPM                 |
| MDGA1               | C6ORF15             |
| IFT27               | NIPAL2              |
| TRERF1              | MIOX                |
| ENSCAFG000000001866 | GRAMD3              |
| C7orf63             | GRHL2               |
| CKAP4               | ADM2                |
| KANK1               | IRF1                |
| GABBR2              | FBXO32              |
| PLEKHH2             | SREBF2              |
| COL15A1             | SQLE                |
| EEPD1               | FAM84B              |
| ENSCAFG000000003238 | EGR1                |
| FOXP2               | FAM83F              |
| RRM2                | EXOC4               |
| ODC1                | MAPK13              |
| ENSCAFG000000003565 | PIM1                |
| NRCAM               | TTC39B              |
| NRP1                | ENSCAFG000000001616 |
| ENSCAFG000000003792 | MOB3B               |
| ZEB1                | ABCB4               |
| EFR3B               | MDR1                |
| NDNF                | TRPM3               |
| PAK1                | GTPBP2              |
| TMEM163             | VEGFA               |

|         |          |
|---------|----------|
| NR1D2   | GSDMD    |
| SH3BP5  | DAPK1    |
| DUSP6   | PDGFB    |
| SOCS2   | PLXNA4   |
| SPRY4   | PODXL    |
| NR3C1   | MDGA1    |
| PRKCDBP | CDC42EP1 |
| SNAI2   | SMO      |
| NR1H4   | TSPAN33  |
| PLAG1   | TTC39B   |
| MALL    | MLLT3    |
| GRAMD1A | DMRTA1   |
| GGH     | PCSK5    |
| IL20RB  | APOL6    |
| GALNT6  | ALDH1A1  |
| PROCR   | DDX58    |
| HK2     | KIF24    |
| PTK2B   | KANK1    |
| KLHL2   | SAMD9L   |
| ANTXR2  | TFPI2    |
| EVA1C   | SLC1A1   |
| HERPUD1 | GPR110   |
| ADAM28  | NCK2     |
| AGPAT9  | PPP1R9A  |
| TOX2    | PKHD1    |
| DENND2C | SEMA4D   |
| ATP2B4  | NPAS2    |
| TOMM34  | NINJ1    |
| STK4    | IGFBP7   |
| PAX2    | TDRD7    |
| TMEFF2  | TSPAN13  |
| CTSE    | PLEKHH2  |
| TFF1    | MACC1    |
| RGS2    | ITGB8    |
| DENND5B | EPAS1    |
| CCND1   | MSH2     |
| TNNT2   | COL12A1  |
| SLC37A2 | GPNMB    |
| ROBO3   | OSBPL3   |
| MMP-14  | MYH14    |

|                    |                    |
|--------------------|--------------------|
| IFT172             | TEC                |
| LTBP4              | GALT               |
| THBD               | TMEM151B           |
| MGAT5B             | ENSCAFG00000002078 |
| SNX5               | IL1RL1             |
| ZEB2               | NFIL3              |
| FLRT3              | ASNS               |
| MKKS               | ICA1               |
| SYT1               | FAM83B             |
| PLCL2              | CNNM4              |
| TMX4               | OXER1              |
| PCNA               | AGR2               |
| COL4A1             | ZNF667             |
| COL4A2             | SLC2A1             |
| SMAD9              | EPS8L1             |
| MORN2              | EPCAM              |
| DDRGK1             | RAPGEF5            |
| PKDCC              | GPNMB              |
| HSPH1              | OSBPL3             |
| NOP56              | SKAP2              |
| STX2               | TAX1BP1            |
| ADAMTS9            | CHN2               |
| TMEM74B            | RASSF6             |
| ENSCAFG00000007045 | GARS               |
| TM9SF4             | RRAGD              |
| SNTA1              | MACF1              |
| RCN1               | AVL9               |
| PALLD              | THAP5              |
| AHCY               | IFRD1              |
| REEP1              | TES                |
| CCNE1              | COBL               |
| CADM2              | STK17A             |
| RBP4               | INHBA              |
| RHOBTB3            | EPHA1              |
| PROCR              | IRF3               |
| MAP1B              | GAB1               |
| CYP2C21            | STOM               |
| PLOD2              | ENSCAFG00000003874 |
| EPB41L1            | ENSCAFG00000003880 |
| ZNF704             | PLEKHA4            |

|          |                    |
|----------|--------------------|
| PTPRC    | ENSCAFG00000003238 |
| K-RAS    | ZNF618             |
| SNAI1    | RSAD2              |
| FCGR1A   | TNFSF15            |
| IRF2BP2  | TSPAN12            |
| FAM65C   | STK17A             |
| MNDA     | FCGRT              |
| UBASH3B  | TBC1D9             |
| CD86     | OSR1               |
| ERN1     | WDR35              |
| LAMB3    | ENSCAFG00000003792 |
| DHRS9    | ENSCAFG00000003845 |
| CA5B     | RHOB               |
| SLC26A6  | KLHL29             |
| C2CD2L   | PRKAR2B            |
| IL10RA   | SLC5A9             |
| ITGA6    | PARP12             |
| EGR2     | PDZK1IP1           |
| GLUL     | HS6ST1             |
| FOSL1    | NOX4               |
| NRP2     | NUP210             |
| LAMC2    | NINL               |
| SIK3     | PRSS23             |
| HIP1     | TSC22D1            |
| ETV5     | PRR2               |
| COX-2    | IGSF23             |
| PLA2G4A  | HID1               |
| SRGN     | TENM4              |
| SYVN1    | NCKAP5             |
| CEACAM1  | HRH1               |
| PEA3     | XYLB               |
| ABLIM2   | INSIG1             |
| TNFSF18  | MGAT5B             |
| SLC11A1  | CAPN14             |
| DNM3     | DGAT2              |
| TNIK     | GDPD5              |
| PLD1     | GPD1L              |
| SDF2L1   | LGALS3BP           |
| BAIAP2L1 | FLRT3              |
| C10orf11 | FARP1              |
| FAM220A  | KIF5C              |

|                    |                    |
|--------------------|--------------------|
| EDIL3              | RAB19              |
| VCAN               | PDZK1IP1           |
| ADAMTS1            | ABTB1              |
| NDRG3              | ZC3HAV1            |
| CTSO               | KIAA1217           |
| PDGFC              | PPM1N              |
| DSN1               | PPP1R13L           |
| SOGA1              | SYTL2              |
| SAMHD1             | GPRC5C             |
| PLEKHA7            | TMCC1              |
| FRAS1              | RELB               |
| ARL2BP             | SERP2              |
| PPP1R16B           | NOS3               |
| FAM83D             | TRANK1             |
| ADAM28             | LLGL2              |
| PLCG1              | KCTD14             |
| VDR                | KRTCAP3            |
| SRSF6              | VILL               |
| IFT52              | LMO7               |
| MYBL2              | INSIG1             |
| ENSCAFG00000009397 | SFMBT2             |
| SLC39A14           | SCEL               |
| E2F8               | FOSL2              |
| CBR3               | CIDEC              |
| LRRK2              | C1orf210           |
| CAP2               | RNASE4             |
| WRB                | RNASE6             |
| TMEFF2             | RNASE1             |
| TFF1               | MBNL2              |
| CDON               | ZFP36              |
| LGR6               | LMCD1              |
| FSTL1              | HBEGF              |
| SDC3               | MYADML2            |
| PTGIS              | SPINT2             |
| SCN9A              | MGAT4C             |
| AIP                | EIF2AK2            |
| MFGE8              | PKP3               |
| NGEF               | ENSCAFG00000006679 |
| PITX2              | NR1H4              |
| SOX2               | ZFAND4             |
| MNDA               | PLK2               |

|          |                    |
|----------|--------------------|
| B4GALNT3 | BHLHE40            |
| ZBTB18   | RNF213             |
| NEDD4    | CXXC5              |
| EPHA2    | IDO2               |
| TNS4     | IDO1               |
| SERPINE2 | SATB1              |
| PPP1R1B  | TACC1              |
| GALNT16  | FGFR1              |
| HEPH     | MGAT4C             |
| DNAH2    | EIF2AK2            |
| ERGIC1   | QPCT               |
| KDM6B    | CDC42EP3           |
| TLN2     | SMAD9              |
| FOS      | DCLK1              |
| SHC1     | SEMA3E             |
| TLE3     | ARHGAP26           |
| SYT4     | P2X2               |
| DEGS2    | NRG1               |
| NCAD     | NTN4               |
| MRP1     | ARID5A             |
| KLHL13   | ENSCAFG00000006550 |
| DOCK11   | ENSCAFG00000006722 |
| ITGA2    | ADAMTS9            |
| DLGAP1   | MAP3K1             |
| DAB2     | ST5                |
| GPC3     | ENSCAFG00000007045 |
| NPR3     | PPP2R3A            |
| MAP7D3   | ENSCAFG00000007099 |
| MYO10    | ENSCAFG00000007115 |
| BGN      | ASAH1              |
| MKNK2    | ANKRD1             |
| SSTR5    | TCP11L1            |
| ERRF1    | DEPDC7             |
| PIK3CD   | TLR3               |
| S1PR1    | RCN1               |
| CCBL1    | SORBS2             |
| LMO4     | PALLD              |
| NQO1     | ADM                |
| CTH      | MPPED2             |
| 7SK      | SNX25              |

|                    |                    |
|--------------------|--------------------|
| ATRNL1             | MTUS1              |
| DALRD3             | LSR                |
| DHRS9              | HPN                |
| GRK5               | TMEM87B            |
| MAP3K6             | SLC16A12           |
| PHYHIPL            | LATS2              |
| FAM13C             | ANKRD1             |
| HTRA1              | PSD4               |
| GPC1               | ENSCAFG00000007307 |
| QSOX1              | EPB41L4A           |
| ARHGDIB            | EIF2AK3            |
| CDC25A             | KRCC1              |
| ENSCAFG00000013064 | NUDT12             |
| ENSCAFG00000013158 | VAMP5              |
| FZD9               | CELA1              |
| MRC2               | OCLN               |
| IVNS1ABP           | YPEL4              |
| LEPREL1            | ENSCAFG00000008181 |
| CLDN16             | KIF13B             |
| IQCJ-SCHIP1        | LIMA1              |
| FN1                | SORBS1             |
| HTRA3              | CP                 |
| GOLIM4             | VEGFC              |
| NID2               | MMP15              |
| FGFR3              | KIFC3              |
| MMP1               | SHROOM3            |
| TIMP1              | MADD               |
| SMTNL2             | SOWAHB             |
| NPTX2              | TMEM144            |
| CREG1              | CCNG2              |
| LIPA               | ENSCAFG00000008716 |
| IQSEC3             | PLLPL              |
| EXO1               | ANXA3              |
| PADI2              | ADCY6              |
| ONECUT1            | RASGEF1B           |
| LEPREL4            | OAS3               |
| EPHA4              | RIPK2              |
| IGFBP4             | HERPUD1            |
| SNCG               | RASAL1             |
| SERPINE2           | DYSF               |

|                    |                    |
|--------------------|--------------------|
| DUSP2              | CELA1              |
| PRSS22             | STOX2              |
| CD55               | ERAP1              |
| ABCA8              | UBE2L6             |
| ENSCAFG00000028542 | DCLK2              |
| PPP1R3C            | SLC43A3            |
| RND3               | ELL2               |
| WNT5A              | MSC                |
| ENSCAFG00000029384 | TRPA1              |
| GADD45A            | FDFT1              |
| ENSCAFG00000029566 | PLOD2              |
| ACER2              | ENSCAFG00000008154 |
| IFNE               | HNF4G              |
| DUSP1              | CXADR              |
| ENSCAFG00000029914 | ENSCAFG00000008335 |
| DNAJB9             | ENSCAFG00000008338 |
| LRAT               | SCARA3             |
| ENSCAFG00000030495 | ZNF704             |
| DUSP5              | EDIL3              |
| ZBED2              | MYL9               |
| ENSCAFG00000030746 | MMP15              |
| ENSCAFG00000030791 | CTSO               |
| EREG               | SCARB2             |
| ENSCAFG00000031502 | PLEKHA7            |
| HPCAL1             | THBS1              |
| ENSCAFG00000032259 | PLCH1              |
| ENSCAFG00000032276 | FRAS1              |
|                    | CCL17              |
|                    | CX3CL1             |
|                    | TGM2               |
|                    | PIK3AP1            |
|                    | VEPH1              |
|                    | KIAA1755           |
|                    | LBP                |
|                    | DDX60              |
|                    | DYSF               |
|                    | ARSB               |
|                    | LOXL2              |
|                    | MRP2               |
|                    | RCAN1              |
|                    | SPP1               |

|                    |          |
|--------------------|----------|
| TTYH3              | C15orf52 |
| ENSCAFG00000016475 | HPSE     |
| FGFR4              | CDS1     |
| GPR125             | UBTD1    |
| POLR2A             | ANKRD2   |
| GALNT16            | ST3GAL6  |
| C17orf96           | CREB3L1  |
| CPLX2              | ESRP1    |
| FUS                | SPINT1   |
| GNGT2              | SORBS3   |
| SPDL1              | CHAC1    |
| SLIT3              | PTPN13   |
| CYFIP2             | SLC10A6  |
| GPR68              | MFSD6    |
| NEO1               | DENND2C  |
| SEMA7A             | ATP2B4   |
| ALDH3A1            | DSP      |
| ENSCAFG00000018321 | PLEKHA6  |
| CD320              | WFDC2    |
| CACHD1             | PRICKLE1 |
| RFX2               | ITGB6    |
| JUN                | WSB2     |
| C1orf233           | VSIG10   |
| THOC6              | PEBP1    |
| AGRN               | KCHIP2   |
| FOXF1              | ST14     |
| FNBP1              | ZNF697   |
| TGFBR3             | IGSF5    |
| LRR8C              | TEX264   |
| FHOD1              | NFKB2    |
| EXOC3L1            | RNF144B  |
| SNORA73            | MBOAT1   |
| 7SK                | RIPK4    |
| ABCA2              | BARX2    |
| GAS1               | CNNM2    |
| CTXN1              | PHLDB2   |
| ITPR1              | IFIH1    |
| ENSCAFG00000023798 | SLC37A1  |
| FASTKD5            | BSDC1    |
| CA2                | FGD4     |
| IGFBP6             | ELF3     |

|                    |                    |          |
|--------------------|--------------------|----------|
| BMP1               | FAM171B            | SLC16A14 |
| WFDC2              | ENSCAFG00000028727 | MANBA    |
| HERC6              | RAB6B              | SLC12A7  |
| EDN1               | ENSCAFG00000029117 | TC2N     |
| IGSF3              | WNT5A              | ADRA2A   |
| CD101              | TGIF2-C2orf24      | LSAMP    |
| KSR2               | ENSCAFG00000029966 | ARHGAP31 |
| ITGB6              | ENSCAFG00000030443 | NPNT     |
| RFC5               | RPS19BP1           | TINAGL1  |
| GMPR               | PID1               | WIPI1    |
| CD40               | GLIPR2             | SERINC2  |
| DUSP8              | CADM4              | ROBO3    |
| NUAK2              | OAF                | FABP3    |
| WRB                | BMP2               | CASP7    |
| CD81               | LGALSL             | ALDH3B1  |
| SNRPN              | GNG2               | NR5A2    |
| CCDC64             | CNRIP1             | GALNT3   |
| MX2                | SNAPC2             | DAO      |
| MX1                | HPCAL1             | ADAP1    |
| RNF144B            | FAM46A             | ITPR2    |
| CNNM2              | FXVD6              | FICD     |
| DYNLL1             | THEM6              | K-RAS    |
| DHCR7              | SRM                | ABLIM1   |
| IFIH1              |                    | C1orf116 |
| FAM65B             |                    | ISG20    |
| CCL20              |                    | AP1G2    |
| CCDC80             |                    | PARD6B   |
| GRB14              |                    | SC4MOL   |
| DAPP1              |                    | BCAS1    |
| MARCKSL1           |                    | IGSF9    |
| ELF3               |                    | SESN2    |
| ENSCAFG00000010717 |                    | KLHL24   |
| C2orf72            |                    | PCK2     |
| SLC12A7            |                    | KIAA1598 |
| TGFBETA2           |                    | LAMB3    |
| TMTC1              |                    | PARP9    |
| TC2N               |                    | DTX3L    |
| FBLN5              |                    | CFLAR    |
| LSAMP              |                    | SPTBN2   |
| IGSF11             |                    | ATF3     |
| ARRDC4             |                    | NFATC4   |

|           |
|-----------|
| NPNT      |
| SPATS2L   |
| UBA7      |
| FSTL1     |
| DAO       |
| SLCO3A1   |
| HDHD1     |
| DISP1     |
| TXNIP     |
| PTGIS     |
| EGF       |
| MFGE8     |
| MID1      |
| ADRBK2    |
| SC4MOL    |
| NFATC2    |
| TIFA      |
| SORL1     |
| BCAS1     |
| ASB9      |
| KIAA1598  |
| PARP9     |
| DTX3L     |
| PARP15    |
| PARP14    |
| KIF7      |
| WDR6      |
| CTSK      |
| TRAF5     |
| UGT8      |
| KALRN     |
| PRSS12    |
| BICC1     |
| ATF3      |
| FGFR2IIIC |
| ITGB5     |
| MGST1     |
| GPC1      |
| CYBRD1    |
| SELENBP1  |

|                        |
|------------------------|
| AIM1L                  |
| CLDN4                  |
| CLDN3                  |
| F11R                   |
| SELENBP1               |
| PLXNB1                 |
| CGN                    |
| SNX27                  |
| TMPRSS4                |
| PLA2G3                 |
| GSG1                   |
| GPRC5A                 |
| LAMC2                  |
| IGF2BP2                |
| HSPB1                  |
| COX-2                  |
| SQRDL                  |
| ENSCAFG0000001377<br>0 |
| PLA2G4A                |
| ADORA2A                |
| APOBEC1                |
| LPP                    |
| TM7SF2                 |
| C11orf85               |
| ENSCAFG0000001404<br>3 |
| MID1IP1                |
| CTSH                   |
| OSBPL1A                |
| CDC42BPG               |
| PDE1A                  |
| ENSCAFG0000001432<br>1 |
| PTPN6                  |
| ENO2                   |
| ERO1L                  |
| LPAR5                  |
| DNM3                   |
| BIRC3                  |
| PLAU                   |
| PLEKHG6                |
| FGFBP1                 |

|                    |
|--------------------|
| ANK3               |
| SEC14L2            |
| MUC20              |
| FXYD2              |
| TNK2               |
| RHOBTB1            |
| GRHL3              |
| RNASEL             |
| ID3                |
| LUZP1              |
| RGL1               |
| NFKBIA             |
| MOV10              |
| PDK3               |
| CLEC7A             |
| POLA1              |
| B2M                |
| ENSCAFG00000013668 |
| MYL4               |
| RTP4               |
| PAI-1              |
| ARNT2              |
| TM7SF2             |
| SYTL5              |
| LEPREL1            |
| CLDN16             |
| CRYAB              |
| MB21D2             |
| FZD2               |
| C1R                |
| IKZF2              |
| PDE1A              |
| ITGAD              |
| EPHB2              |
| B3GALNT1           |
| EXPH5              |
| C1S                |
| PTPN6              |
| BCHE               |
| TNS1               |
| ITGAV              |

|                        |
|------------------------|
| SDF2L1                 |
| BST1                   |
| SLC3A2                 |
| DAAM1                  |
| PAPSS2                 |
| TMEM30B                |
| ARHGEF10L              |
| EVC2                   |
| SFTPD                  |
| ZBTB18                 |
| SYNE2                  |
| FAM214A                |
| CXCL16                 |
| JUP                    |
| ENSCAFG0000001593<br>1 |
| FADS2                  |
| PLEKHG3                |
| SLC2A4                 |
| AP1S3                  |
| ENSCAFG0000001625<br>2 |
| CGNL1                  |
| MYZAP                  |
| ARAP2                  |
| TMEM51                 |
| PPP1R1B                |
| MAP3K9                 |
| OPHN1                  |
| STARD8                 |
| ZFYVE1                 |
| ERGIC1                 |
| KDM6B                  |
| NPC2                   |
| LRP                    |
| MUC1                   |
| FOS                    |
| JDP2                   |
| WWC1                   |
| YPEL3                  |
| NUPR1                  |
| IGDCC4                 |
| TMEM63C                |



|                    |
|--------------------|
| IFI35              |
| HSPG2              |
| CASP12             |
| ECE1               |
| RPL22L1            |
| ATP8B4             |
| FGFR3              |
| MMP13              |
| RARRES3            |
| BIRC3              |
| TAPBPL             |
| FGFBP1             |
| TNFSF10            |
| DHX58              |
| SFTPD              |
| RHOJ               |
| SYNE2              |
| FAM213A            |
| CXCL16             |
| NSUN7              |
| WNT5B              |
| FSCN1              |
| SHROOM4            |
| SNCG               |
| ENSCAFG00000016170 |
| ENSCAFG00000016252 |
| TTYH3              |
| KIAA0247           |
| CASZ1              |
| PRR15L             |
| CA12               |
| NFIX               |
| TRIM46             |
| ACSF2              |
| EPN3               |
| MYH10              |
| STON2              |
| FLRT2              |
| GPR68              |
| ENSCAFG00000017632 |
| SCNN1B             |

|                    |
|--------------------|
| HOOK2              |
| MYH10              |
| ADRA1B             |
| SEL1L              |
| TOM1L1             |
| USP43              |
| LDLR               |
| AP1M2              |
| FAM211A            |
| GPRC5B             |
| DSG3               |
| SPECC1             |
| TMC7               |
| KLHL13             |
| CAMSAP3            |
| ESM1               |
| FST                |
| ITGA2              |
| RAB11FIP4          |
| DLGAP1             |
| PDE4B              |
| SH2D3A             |
| LGALS9             |
| INADL              |
| ENSCAFG00000018826 |
| MBNL3              |
| NPR3               |
| MYO5B              |
| DHCR24             |
| LIPG               |
| NXN                |
| STAP2              |
| PPL                |
| VASN               |
| CCDC64B            |
| ARHGEF16           |
| ENSCAFG00000019801 |
| NTNG2              |
| IRF8               |
| CMIP               |
| CDYL2              |

|                    |
|--------------------|
| CLMN               |
| SLC44A2            |
| NEO1               |
| FHOD3              |
| CD276              |
| EVL                |
| SEMA7A             |
| C19orf66           |
| B4GALT6            |
| TMC5               |
| CD74               |
| IL13RA2            |
| ARHGEF37           |
| ENSCAFG00000018385 |
| ENSCAFG00000018572 |
| OXCT1              |
| ARHGAP28           |
| C3                 |
| TUBB4A             |
| LGALS9             |
| OSMR               |
| LIFR               |
| MKL2               |
| GPC4               |
| PIPOX              |
| CDH6               |
| DHCR24             |
| GABRA3             |
| AGRN               |
| ISG15              |
| GADD45B            |
| FAM213B            |
| CAMTA1             |
| DENND2D            |
| COL5A1             |
| OLFM3              |
| GBP6               |
| PSMB10             |
| IFI44              |
| SNORA73            |

|                    |
|--------------------|
| CCBL1              |
| FA2H               |
| TF                 |
| HSPA5              |
| CYR61              |
| MCOLN3             |
| CDH3               |
| CDH1               |
| ESRP2              |
| DUSP2              |
| SOWAHC             |
| KRT13              |
| OAS1               |
| PRSS22             |
| KRT19              |
| SULT1C4            |
| ENSCAFG00000023754 |
| SGPP2              |
| PTGFRN             |
| IGFL3              |
| CLDN9              |
| PRRG2              |
| SERPINB5           |
| ABCA8              |
| ENSCAFG00000025389 |
| DHRS2              |
| IGJ                |
| TMPRSS11E          |
| CMPK2              |
| ABHD17C            |
| PPP1R3C            |
| CSRP1              |
| RND3               |
| KCNK5              |
| ENSCAFG00000029384 |
| HAS2               |
| CLIC2              |
| GADD45A            |
| ATF5               |
| FOXN2              |

|                    |
|--------------------|
| OAS2               |
| ERBB4              |
| CYP4A37            |
| HAVCR1             |
| OAS1               |
| VNN1               |
| ENSCAFG00000023625 |
| LOXL1              |
| ENSCAFG00000024641 |
| KIF21B             |
| FOLH1              |
| CA2                |
| ENSCAFG00000025394 |
| SNORA31            |
| TDRP               |
| TMPRSS11E          |
| FAM171B            |
| PPAP2B             |
| CMPK2              |
| NREP               |
| TRIB2              |
| TIMP3              |
| CLDN1              |
| BASP1              |
| CLIC2              |
| B3GALT5            |
| BMF                |
| POU3F2             |
| STXBP6             |
| MMD                |
| PAQR8              |
| BAMBI              |
| ENSCAFG00000030283 |
| LTB                |
| SERPINB9           |
| PID1               |
| IL22RA1            |
| PSMB9              |

|                    |
|--------------------|
| ACER2              |
| MSRB3              |
| DUSP1              |
| TSC22D3            |
| DNAJB9             |
| DDAH1              |
| ENSCAFG00000030095 |
| ENSCAFG00000030204 |
| C3orf52            |
| ENSCAFG00000030354 |
| DUSP5              |
| PPP1R15A           |
| ARHGAP8            |
| FDPS               |
| SLC25A29           |
| ENSCAFG00000030791 |
| IDI1               |
| LIF                |
| EMP1               |
| YPEL5              |
| KRT14              |
| TMEM86A            |
| SPINK6             |
| cfa-mir-147        |
| ENSCAFG00000031502 |
| ENSCAFG00000031509 |
| CRADD              |
| STC2               |
| C6orf132           |
| NIPAL1             |
| C11orf52           |
| ENSCAFG00000032099 |
| ENSCAFG00000032171 |
| OLFM1              |
| ENSCAFG00000032276 |
| DDIT4              |
| WNT7A              |

|                    |
|--------------------|
| CA13               |
| PXDC1              |
| RALA               |
| ENSCAFG00000030956 |
| SERTAD4            |
| SH2B2              |
| ENSCAFG00000031299 |
| BST2               |
| SPINK6             |
| PMEPA1             |
| GNA14              |
| WNT9A              |
| ICAM1              |
| GLIS3              |
| LGALSL             |
| IFIT3              |
| GNG2               |
| ENSCAFG00000032102 |
| ENSCAFG00000032171 |
| DLA-12             |
| CLEC2L             |
| PDGFD              |
| THEM6              |

Supplementary Table 2 Antibodies

| No. | Name                                                             | Target                                                                      | Company                              | Cat. No.       | Experiment |
|-----|------------------------------------------------------------------|-----------------------------------------------------------------------------|--------------------------------------|----------------|------------|
| 1   | Anti-Human CD49f Clone GoH3                                      | Human $\alpha$ 6-integrin                                                   | BD Pharmingen                        | 555734         | FACS, IF   |
| 3   | Anti-Integrin alpha 6 antibody                                   | Human $\alpha$ 6-integrin                                                   | Abcam                                | ab97760        | WB         |
| 4   | Anti-Integrin beta1 antibody                                     | Human $\beta$ 1-integrin                                                    | Millipore                            | AB1952         | WB         |
| 5   | Anti-Integrin beta 4                                             | Human $\beta$ 4-integrin                                                    | Abcam                                | ab-29042       | WB         |
| 6   | Anti-Integrin alphaV Antibody                                    | Human $\alpha$ V-integrin                                                   | Millipore                            | AB1930         | WB,IF      |
| 7   | Anti-HA                                                          | HA-tag                                                                      | Sigma-Aldrich                        | H9658          | WB,IF      |
| 8   | Monoclonal Anti- $\beta$ -Tubulin                                | Human $\beta$ -Tubulin                                                      | Sigma-Aldrich                        | T4026          | WB         |
| 9   | Phospho-Src Family (Tyr416) Antibody                             | Tyr419 of human Src                                                         | Cell Signaling Technology            | 2101           | WB, IF     |
| 10  | Src (36D10) Rabbit mAb                                           | Human Src                                                                   | Cell Signaling Technology            | 36D10          | WB, IF     |
| 11  | Cleaved Caspase-3 (Asp175)                                       | (Asp175) in human caspase-3                                                 | Cell Signaling Technology            | 9661           | IF         |
| 12  | Phospho-p44/42 MAPK (Erk1/2)                                     | Thr202/Tyr204 of human p44 MAP kinase                                       | Cell Signaling Technology            | 9101           | WB         |
| 13  | p44/42 MAPK (Erk1/2)                                             | C-terminus of rat p44 MAP Kinase                                            | Cell Signaling Technology            | 4695           | WB         |
| 14  | FOSL1 antibody                                                   | Human FOSL1                                                                 | Developmental Studies Hybridoma Bank | PCRP-FOSL1-1E3 | WB, ChIP   |
| 15  | c-Fos antibody (H-125)                                           | Human c-Fos                                                                 | Santa Cruz Biotechnology             | sc-7202 X      | WB, ChIP   |
| 16  | Vimentin                                                         | Human Vimentin                                                              | Dako                                 | M072529-2      | WB, IF     |
| 17  | Mouse Anti-E-Cadherin                                            | Human E-Cadherin C-terminal Recombinant Protein                             | BD Transduction Laboratories         | 610182         | WB, IF     |
| 18  | Phospho-Akt (Ser473) Antibody                                    | Ser473 of mouse Akt                                                         | Cell Signaling Technology            | 9271           | WB         |
| 19  | Akt (pan) (C67E7)                                                | Mouse Akt                                                                   | Cell Signaling Technology            | 4691           | WB         |
| 20  | Anti-Caspase-3                                                   | Cleavage site of human caspase 3                                            | Sigma-Aldrich                        | C8487          | WB         |
| 21  | Anti-Integrin alphaV Antibody                                    | Human Integrin $\alpha$ V $\beta$ 3                                         | LifeSpan BioSciences                 | LS-C15967      | FACS       |
| 22  | Bax Antibody (6A7)                                               | N-terminal residues 12-24 to human Bax                                      | Santa Cruz Biotechnology             | sc-23959       | WB         |
| 23  | Bim Antibody (H-5)                                               | Amino acids 4-195 of BimEL of human origin                                  | Santa Cruz Biotechnology             | sc-374358      | WB         |
| 24  | NOXA Antibody (114C307)                                          | a fusion protein containing NOXA of human origin                            | Santa Cruz Biotechnology             | sc-56169       | WB         |
| 25  | Smad2/3 Antibody                                                 | Endogenous levels of total Smad2/3 protein                                  | Cell Signaling Technology            | 5678           | WB         |
| 26  | Phospho-Smad2 (Ser465/467)/Smad3 (Ser423/425) (D27F4) Rabbit mAb | Endogenous levels of Smad2 protein when phosphorylated at Ser465 and Ser467 | Cell Signaling Technology            | 12005          | WB         |
| 27  | Monoclonal Anti- $\beta$ -Actin antibody                         | Slightly modified $\beta$ -cytoplasmic actin N-terminal peptide             | Sigma-Aldrich                        | A5441          | WB         |

Supplementary Table 3 Gene cloning and related primers

| No. | primer                            | Sequence 5' to 3'                                     | target                         | vector                                              |
|-----|-----------------------------------|-------------------------------------------------------|--------------------------------|-----------------------------------------------------|
| 1   | IRES-GFP-f                        | ccccccccctaacgttact                                   | IRES-GFP                       | pLVET-IRES-GFP                                      |
| 2   | IRES-GFP-r                        | ttactgtacagctcgtccatgc                                |                                |                                                     |
| 5   | $\beta$ -catenin <sup>4A</sup> -f | tttgccaccatggctactcaagctgacctgatgg                    | $\beta$ -catenin <sup>4A</sup> | pLVET- $\beta$ -catenin <sup>4A</sup> -<br>IRES-GFP |
| 6   | $\beta$ -catenin <sup>4A</sup> -r | gctaggacgcgcgtaagcaggtggtccagggattccattc<br>tcgttcgat |                                |                                                     |
| 9   | K-Ras <sup>V12</sup> -f           | agctttgtttaaacatgtaccatacagatgttcca                   | K-Ras <sup>V12</sup>           | pLVET-K-Ras <sup>V12</sup> -IRES-<br>GFP            |
| 10  | K-Ras <sup>V12</sup> -r           | cgacgcgtaggtggtcccataattacacactttgtcttgac             |                                |                                                     |
| 11  | H-Ras <sup>V12</sup> -f           | agctttgtttaaacatgacggaatataagctggggg                  | H-Ras <sup>V12</sup>           | pLVET-H-Ras <sup>V12</sup> -IRES-<br>GFP            |
| 12  | H-Ras <sup>V12</sup> -r           | cgacgcgtaggtggtccggagagcacacactgcagct                 |                                |                                                     |
| 13  | DogITGA6-PmoF                     | ccgctcgagaatttgattgtagcagtatgtg                       | ITGA6-<br>promoter             | pGL3-ITGA6-promoter                                 |
| 14  | DogITGA6-PmoR                     | ccaagctcagttcaaaactggttctg                            |                                |                                                     |

Supplementary Table 4 Target sequences of CRISPR/Cas9

| No. | name                           | gene         | Type | target region | target sequence 5' to 3' |
|-----|--------------------------------|--------------|------|---------------|--------------------------|
| 1   | lentiCRISPR/ <i>ITGA6</i> -KO1 | <i>ITGA6</i> | gRNA | CDS exon 1    | CGGATTGAATTTGACAACGA     |
| 2   | lentiCRISPR/ <i>ITGA6</i> -KO2 | <i>ITGA6</i> | gRNA | CDS exon 2    | GTACAAGCCTCCAGTTCTGT     |
| 3   | lentiCRISPR/ <i>FOSL1</i> -KO1 | <i>FOSL1</i> | gRNA | CDS exon 1    | CCGGCGCAGACCCCCACTTC     |
| 4   | lentiCRISPR/ <i>FOSL1</i> -KO2 | <i>FOSL1</i> | gRNA | CDS exon 2    | GGTCCTAGGACCACCTCCAG     |

Supplementary Table 5 Oligonucleotides used in this study

| No. | Experiment | primer description             | Sequence 5' to 3'      |
|-----|------------|--------------------------------|------------------------|
| 1   | RT-qPCR    | $\alpha$ 2-integrin-f          | CACATAGGCTCCCACACCTT   |
| 2   | RT-qPCR    | $\alpha$ 2-integrin-r          | CCACAATGTTGTCGTTCCAG   |
| 3   | RT-qPCR    | $\alpha$ 3-integrin-f          | CATCTACCACAGCAGCTCCA   |
| 4   | RT-qPCR    | $\alpha$ 3-integrin-r          | CTCCTCCCCATGGATTACCT   |
| 5   | RT-qPCR    | $\alpha$ 5-integrin-f          | GACGACACGGAGGACTTTGT   |
| 6   | RT-qPCR    | $\alpha$ 5-integrin-r          | TGTCTGAGCCATTGAGGATG   |
| 7   | RT-qPCR    | $\alpha$ 6-integrin-f          | AGTGGAGCTGTGGTTTTGCT   |
| 8   | RT-qPCR    | $\alpha$ 6-integrin-r          | AGACCTTCCCCGTCAAAAAT   |
| 9   | RT-qPCR    | $\alpha$ V-integrin-f          | TCCAGGTGGAGCTTCTTTTG   |
| 10  | RT-qPCR    | $\alpha$ V-integrin-r          | TTCTTAGAGTGACCTGGAGACC |
| 11  | RT-qPCR    | $\beta$ 1-integrin-f           | ATCCCAGAGGCTCCAAAGAT   |
| 12  | RT-qPCR    | $\beta$ 1-integrin-r           | GCTGGAGCTTCTCTGCTGTT   |
| 13  | RT-qPCR    | $\beta$ 3-integrin-f           | GACCTTTGAGTGTGGGGTGT   |
| 14  | RT-qPCR    | $\beta$ 3-integrin-r           | TCTTCCGAGCATTCACTG     |
| 15  | RT-qPCR    | $\beta$ 4-integrin-f           | ACAGTCCCAAGAAACGGATG   |
| 16  | RT-qPCR    | $\beta$ 4-integrin-r           | CCTTCACCGTGTAGCGGTAT   |
| 17  | RT-qPCR    | $\beta$ 5-integrin-f           | AAGCCCATCTCCACACACTC   |
| 18  | RT-qPCR    | $\beta$ 5-integrin-r           | AGGAGAAGGGGCTCTCAGTC   |
| 19  | RT-qPCR    | $\beta$ 6-integrin-f           | TGAGACCAGGCAGTGAACAG   |
| 20  | RT-qPCR    | $\beta$ 6-integrin-r           | CCGAGAGGTCCATGAGGTAA   |
| 21  | RT-qPCR    | $\beta$ 8-integrin-f           | CGTGACTTCCGCTTGGATT    |
| 22  | RT-qPCR    | $\beta$ 8-integrin-r           | CCTTTCTGGGTGGATGCTAA   |
| 23  | RT-qPCR    | Snail1-f                       | CAAGATGCACATCCGAAGC    |
| 24  | RT-qPCR    | Snail1-r                       | GAGCAGGAAAACGGCTTCTC   |
| 25  | RT-qPCR    | Snail2-f                       | CGTTTTCCAGACCCTGGTTA   |
| 26  | RT-qPCR    | Snail2-r                       | TGACCTGTCTGCAAATGCTC   |
| 27  | RT-qPCR    | Zeb1-f                         | GAAGGTGATCCAGCAAATG    |
| 28  | RT-qPCR    | Zeb1-r                         | CTTCCGCATTTTCTTTTTGG   |
| 29  | RT-qPCR    | Zeb2-f                         | GCCATTATTTACCCCGAAGC   |
| 30  | RT-qPCR    | Zeb2-r                         | AGTAGGGGCAGGTCAGCAGT   |
| 31  | RT-qPCR    | Twist1-f                       | GCCGGAGACCTAGATGTCATT  |
| 32  | RT-qPCR    | Twist1-r                       | CACGCCCTGTTTCTTTGAAT   |
| 33  | RT-qPCR    | Twist2-f                       | CTCGGACAAGCTCAGCAAGA   |
| 34  | RT-qPCR    | Twist2-r                       | TGCAGGACCTGGTAGAGGAA   |
| 35  | ChIP-qPCR  | $\alpha$ 6-integrin-promoter-f | GCCCAAGAACTCTTGCCAAT   |
| 36  | ChIP-qPCR  | $\alpha$ 6-integrin-promoter-r | GGTCTAAAGCCTCCTGCCTC   |
